# Supplementary material
Source: publisher site journal article supplement (https://www.spandidos-publications.com/4910/downloadSupplementary)

Figure S1. Identification of primary mouse renal tubular epithelial cells. Immunofluorescence detection of epithelial cell marker (CK18). Scale bar, 50  $\mu$ m. CK, cytokeratin.

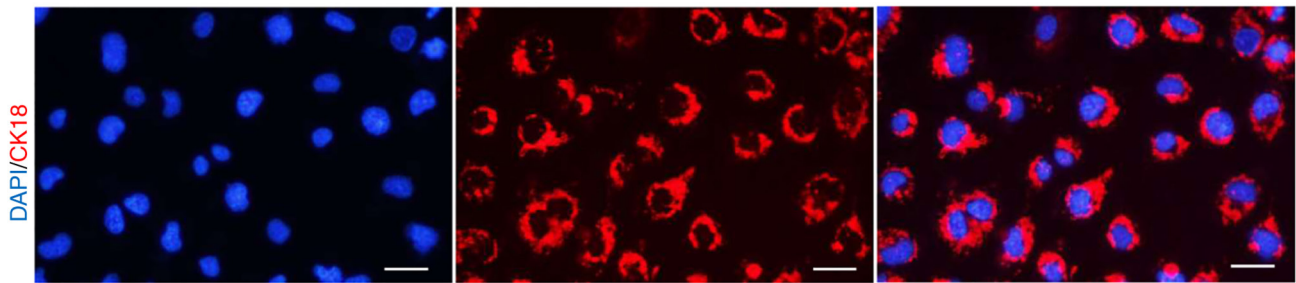

Figure S2. Osmotic pressure has no effect on tubular epithelial cells. (A) mRNA and (B) protein expression levels of fibronectin, collagen I and  $\alpha$ -SMA. The relative levels were normalized to GAPDH. \*\* $P < 0.01$  and \*\*\* $P < 0.001$ . ns, non-significant; M, D-mannitol; HG, high glucose;  $\alpha$ -SMA,  $\alpha$ -smooth muscle actin.

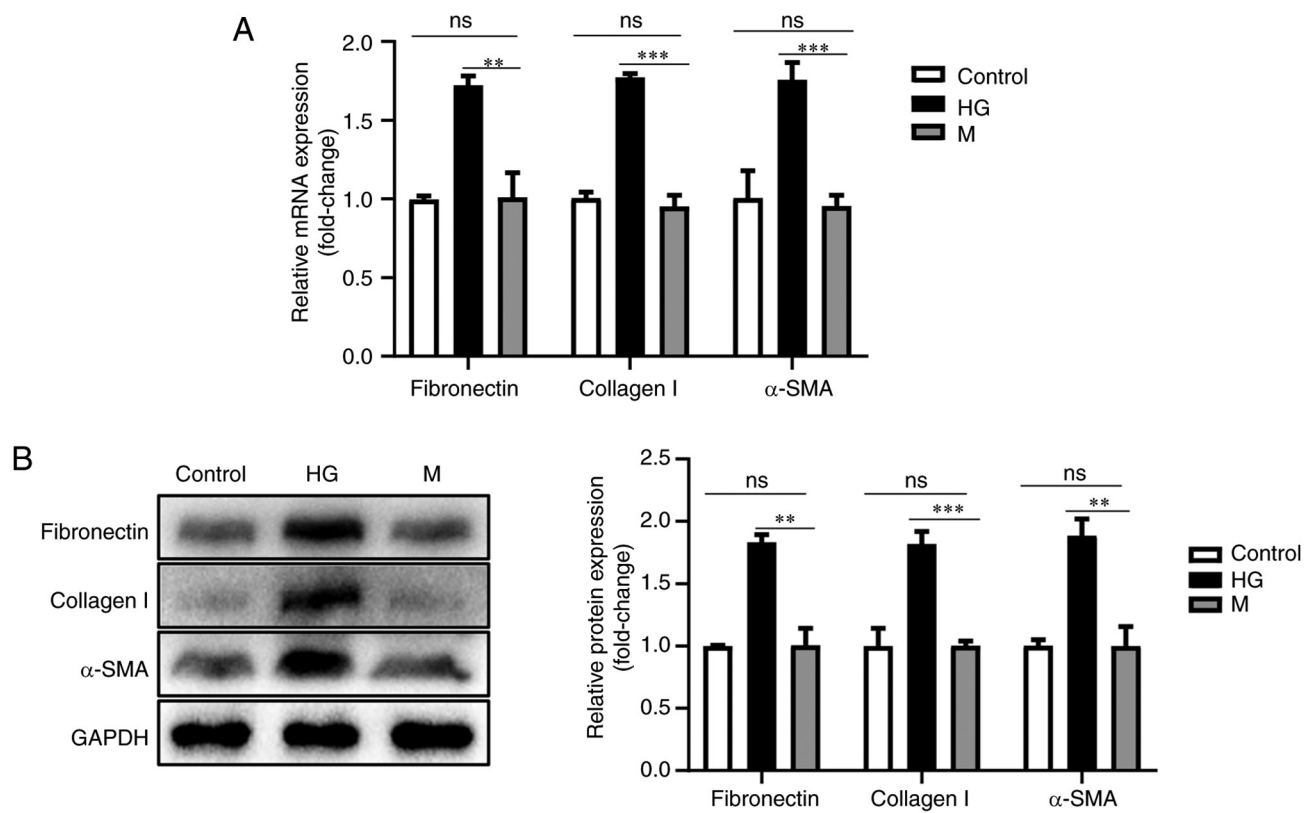

Supplement: Supplementary file 1 [file downloadSupplementary]
